# Supplementary material
Source: HighWire-hosted journal article supplement (https://erj.ersjournals.com/highwire/filestream/114321/field_highwire_adjunct_files/0/ERJ-00602-2014_CTischer_online_supplement1A_F_14_07_14_R1.pdf)
Supplement: ERJ-00602-2014_CTischer_online_supplement1A_F_14_07_14_R1.pdf [file ERJ-00602-2014_CTischer_online_supplement1A_F_14_07_14_R1.pdf]

**ONLINE supplement fig S1A:** GAM Plots of the association between exposure to **endotoxin (concentrations)** and asthma outcomes (aORs 95% CI)\*

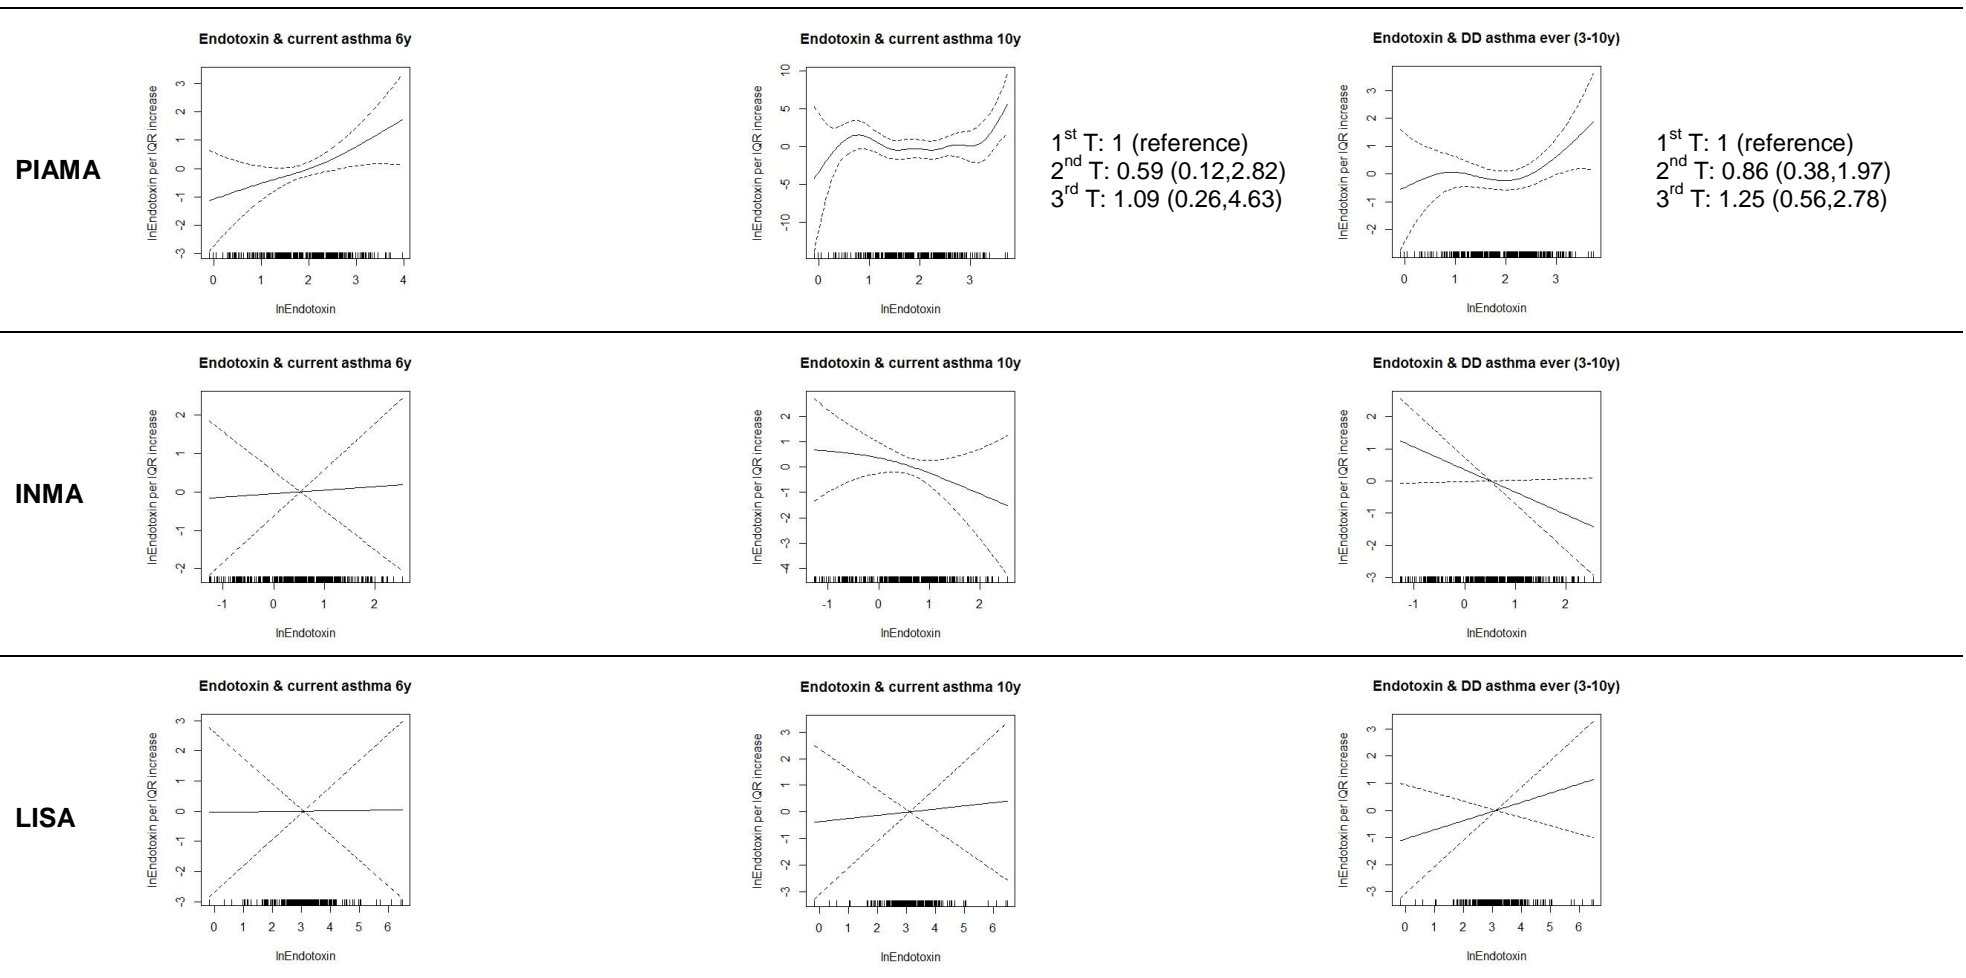

\*adjusted for: gender, maternal smoking during pregnancy, breastfeeding, parental education level, parental asthma, cat ownership (0-1y), dog ownership (0-1y), season of dust sampling

**ONLINE supplement fig S1B:** GAM Plots of the association between exposure to **(1,3)-β-D-glucan (concentrations)** and asthma outcomes (aORs 95% CI)\*

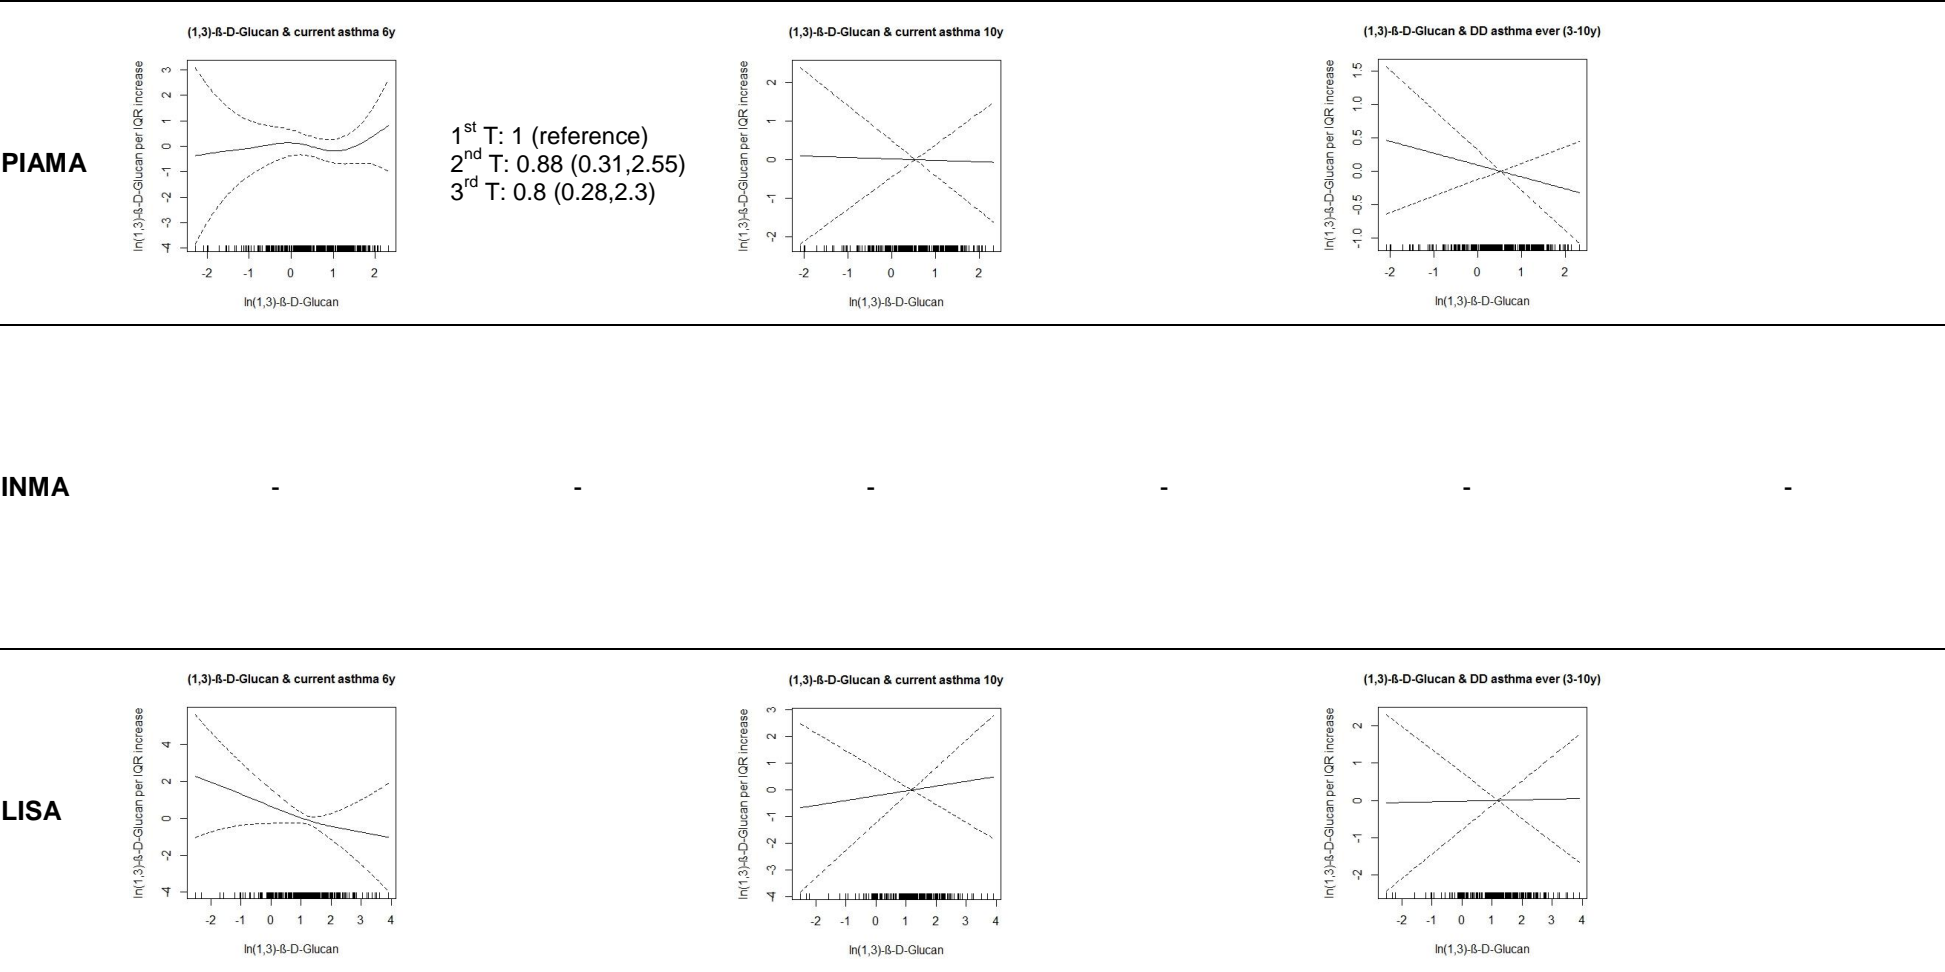

**ONLINE supplement fig S1C:** GAM Plots of the association between exposure to **EPS (concentrations)** and asthma outcomes (aORs 95% CI)\*

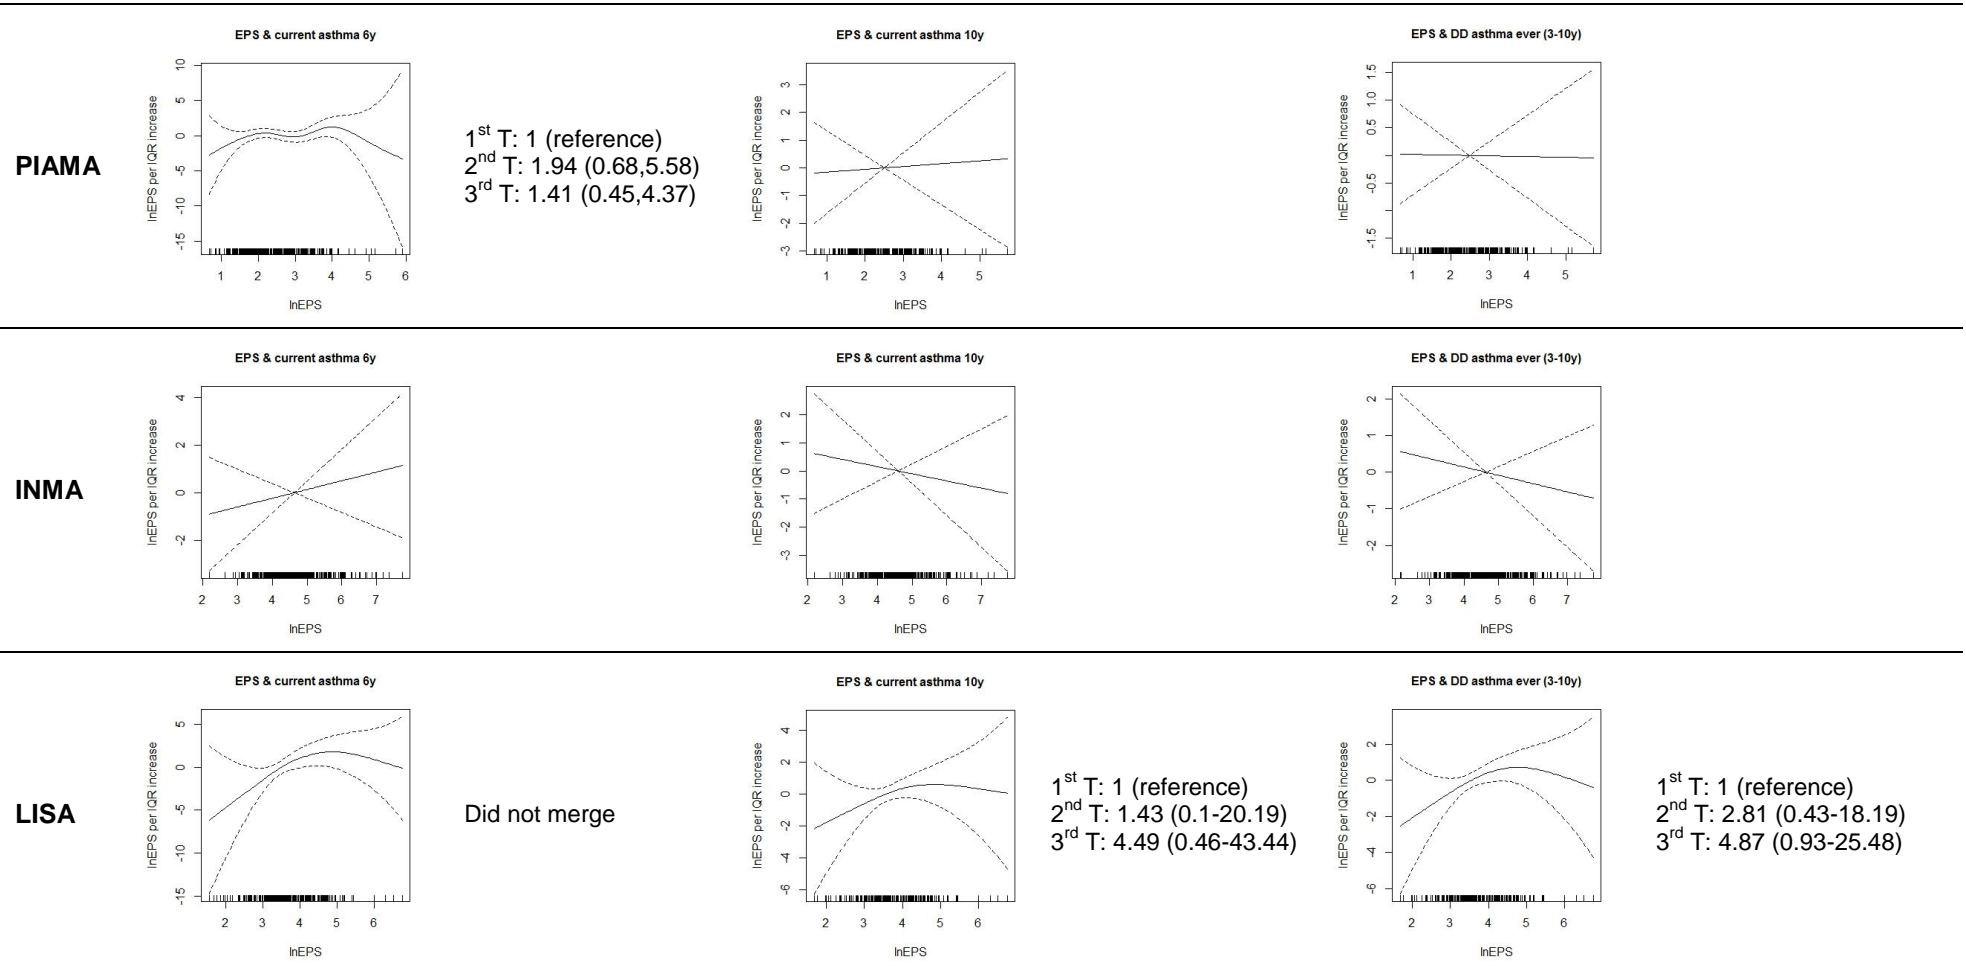

\*adjusted for: gender, maternal smoking during pregnancy, breastfeeding, parental education level, parental asthma, cat ownership (0-1y), dog ownership (0-1y), season of dust sampling

ONLINE supplement fig S1D: GAM Plots of the association between exposure to **endotoxin (loads)** and asthma outcomes (aORs 95% CI)\*

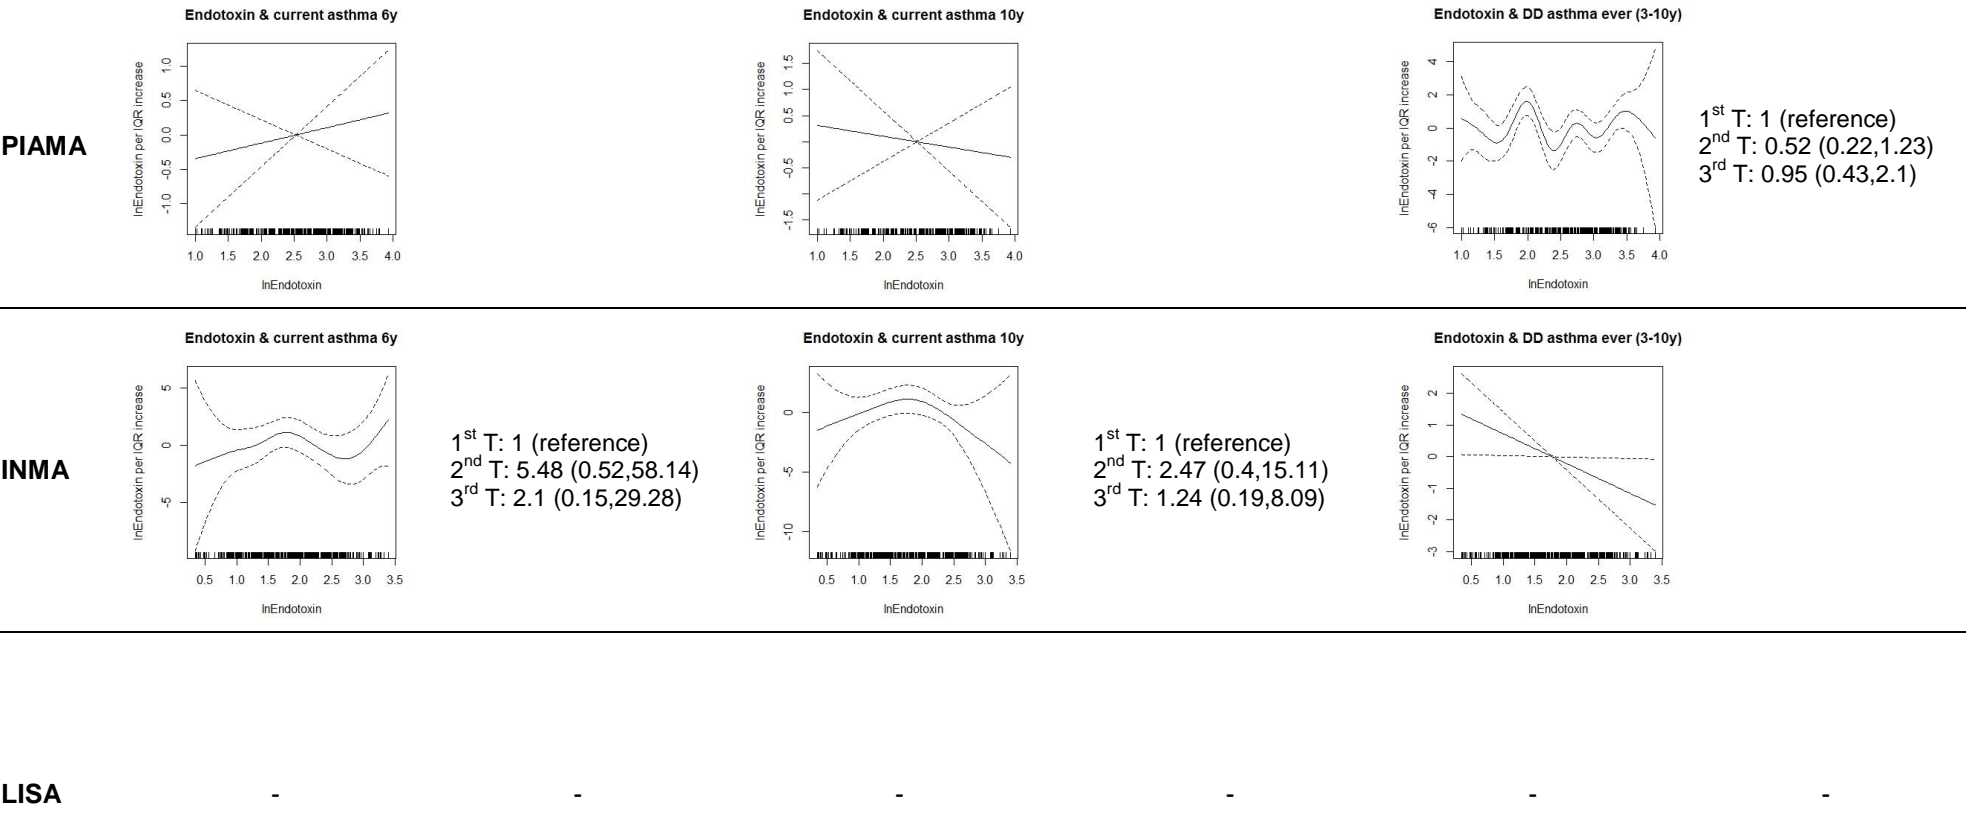

**ONLINE supplement fig S1E:** GAM Plots of the association between exposure to **EPS (loads)** and asthma outcomes (aORs 95% CI)\*

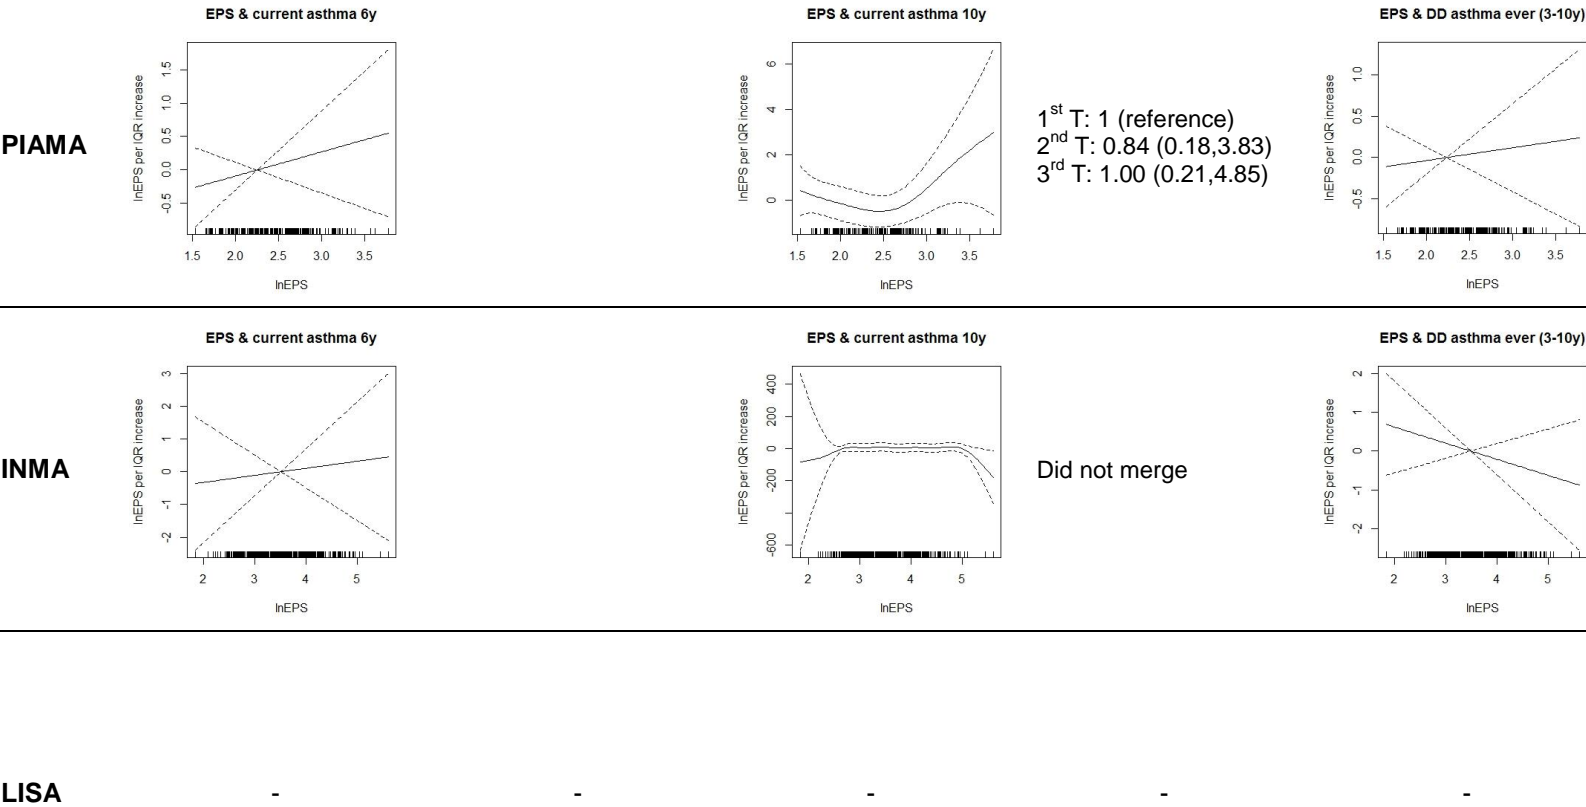

\*adjusted for: gender, maternal smoking during pregnancy, breastfeeding, parental education level, parental asthma, cat ownership (0-1y), dog ownership (0-1y), season of dust sampling

**ONLINE supplement fig S1F:** GAM Plots of the association between exposure to measured **bio-contaminants (concentrations)** and allergic sensitization to aero-allergens\* at 10 years (IgE ≥ 0.35 kU/L) (aORs 95% CI)\*

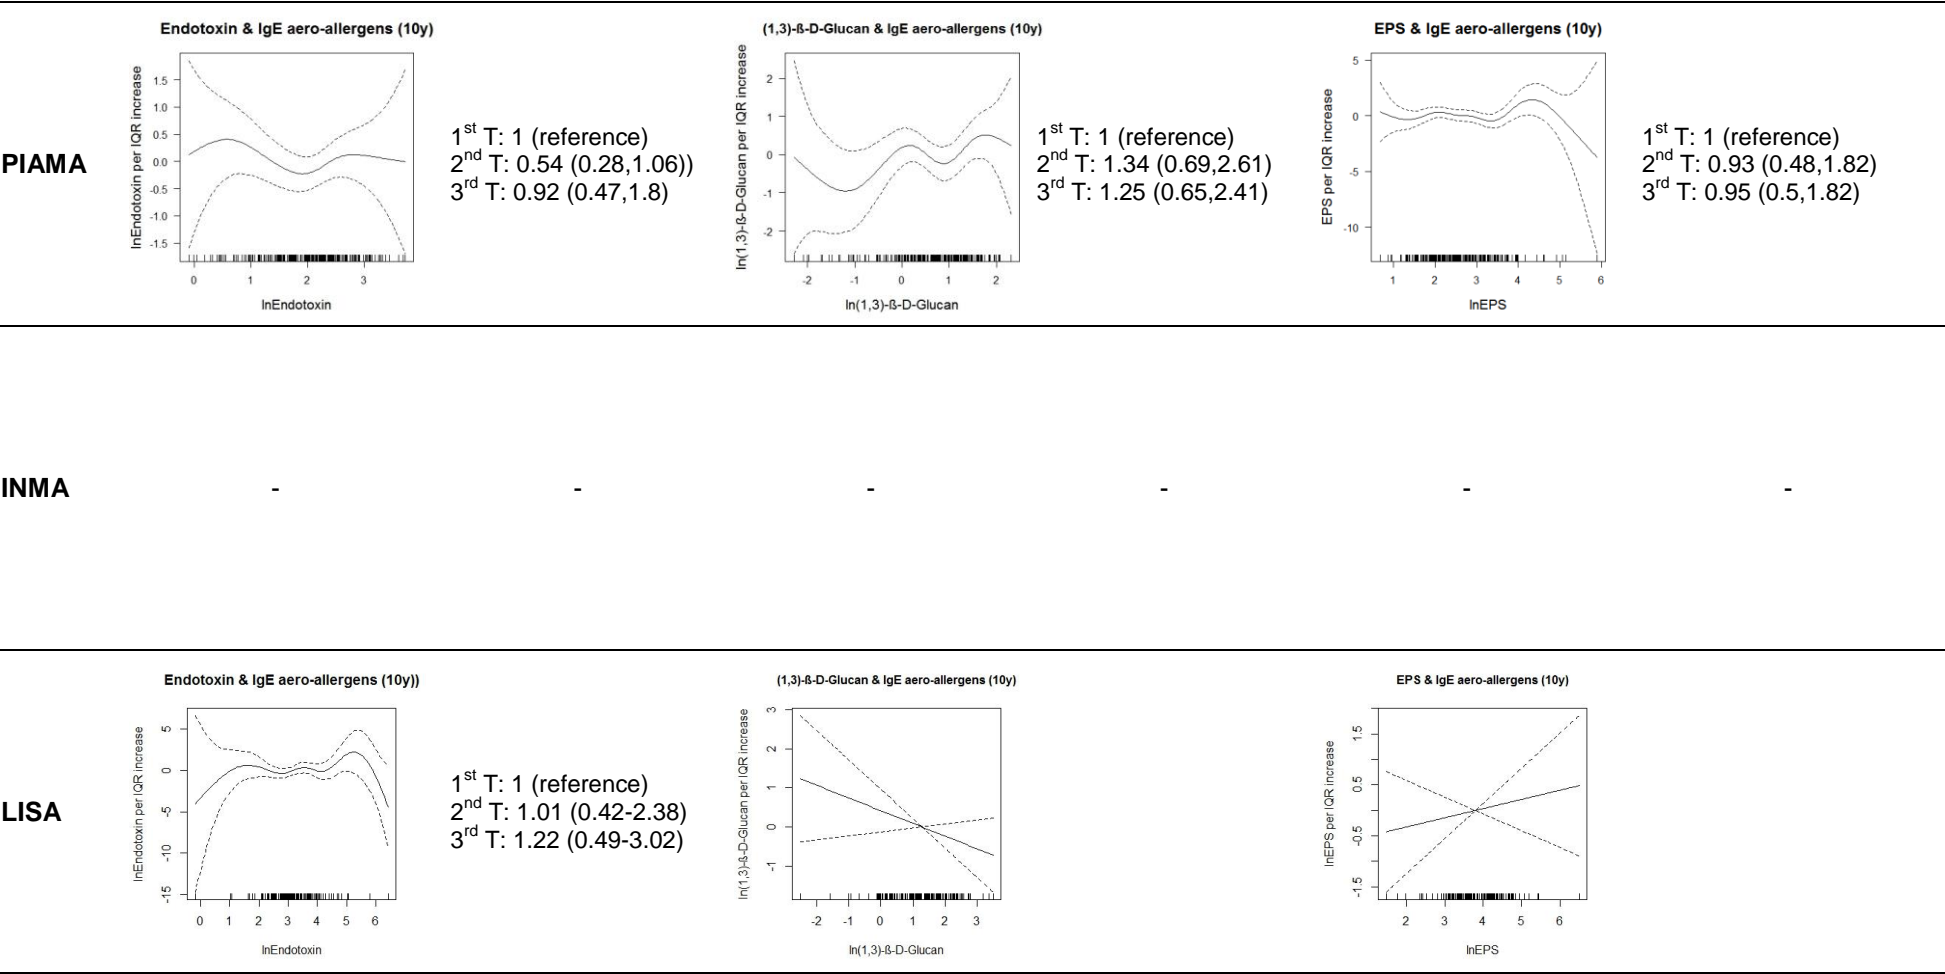

\*adjusted for: gender, maternal smoking during pregnancy, breastfeeding, parental education level, parental asthma, cat ownership (0-1y), dog ownership (0-1y), season of dust sampling
